# Supplementary material for: Isatin-Hydrazones with Multiple Receptor Tyrosine Kinases (RTKs) Inhibitory Activity and In-Silico Binding Mechanism
Source: MDPI journal article supplement (doi:10.3390/app11093746), 2021-04-21
Supplement: s1 [file s1]

# Isatin-Hydrazones with Multiple Receptor Tyrosine Kinases (RTKs) Inhibitory Activity and In-Silico Binding Mechanism

Huda S. Al-Salem <sup>1,\*</sup>, Md Arifuzzaman <sup>2</sup>, Iman S. Issa <sup>1</sup> and A. F. M. Motiur Rahman <sup>1,\*</sup>

<sup>1</sup>Department of Pharmaceutical Chemistry, College of Pharmacy, King Saud University, 11451 Riyadh, Saudi Arabia; iman\_issa69@yahoo.com (I.S.I.)

<sup>2</sup>College of Pharmacy, Yeungnam University, 38541 Gyeongsan, Korea; arifmilon2016@ynu.ac.kr.

\* Correspondence: Correspondence: hhalsalem@ksu.edu.sa (H.S.A.-S.); afmrahman@ksu.edu.sa (A.F.M.M.R.); Tel.: +966-11-29-52740 (H.S.A.); Tel.: +966-11-46-70237 (A.F.M.M.R.)

## Supplementary Materials

| Entry     | Contents                                                                 | Page no. |
|-----------|--------------------------------------------------------------------------|----------|
| Table S1  | Enzyme assays for compounds <b>1</b> and <b>2</b>                        | S1       |
| Figure S1 | Calculation of the IC <sub>50</sub> Values of Protein Kinase Enzyme EGFR | S2       |
|           | Experimental data for compounds <b>1</b> and <b>2</b>                    | S3       |

**Table S1.** Enzyme assays for compounds **1** and **2**.

| Compounds            | Conc.<br>( $\mu$ M) | Log Conc | % Inhibition*     |                      |                    |
|----------------------|---------------------|----------|-------------------|----------------------|--------------------|
|                      |                     |          | EGFR <sup>a</sup> | VEGFR-2 <sup>b</sup> | FLT-3 <sup>c</sup> |
| <b>1</b>             | 10                  | 4        | 88.32868          | 84.37254             | 74.25952           |
|                      | 1                   | 3        | 69.07922          | 53.50145             | 38.96826           |
|                      | 0.1                 | 2        | 44.60802          | 32.28704             | 19.49138           |
|                      | 0.01                | 1        | 5.631365          | 4.897566             | 4.386743           |
|                      | 0                   | 0        | 0                 | 0                    | 0                  |
| <b>2</b>             | 10                  | 4        | 85.82672          | 86.81035             | 83.51873           |
|                      | 1                   | 3        | 64.37524          | 70.38339             | 51.80122           |
|                      | 0.1                 | 2        | 36.87912          | 38.94649             | 30.51339           |
|                      | 0.01                | 1        | 5.67763           | 11.52302             | 11.68087           |
|                      | 0                   | 0        | 0                 | 0                    | 0                  |
| <b>Control Drugs</b> | 10                  | 4        | 93.94549          | 91.37509             | 91.30169           |
|                      | 1                   | 3        | 83.30032          | 74.77711             | 63.95949           |
|                      | 0.1                 | 2        | 60.25763          | 54.45391             | 34.19259           |
|                      | 0.01                | 1        | 28.48952          | 26.19801             | 18.64113           |
|                      | 0                   | 0        | 0                 | 0                    | 0                  |

<sup>a</sup>Erlotinib, <sup>b</sup>Sorafenib and <sup>c</sup>Sunitinib were used as control for protein kinase enzymes EGFR, VEGFR-2 and FLT-3 inhibitory test, respectively. \* Here, average experimental data (from triplicate values) is given, and the calculated IC<sub>50</sub> values from the average (triplicated values) values are provided in the table 1.

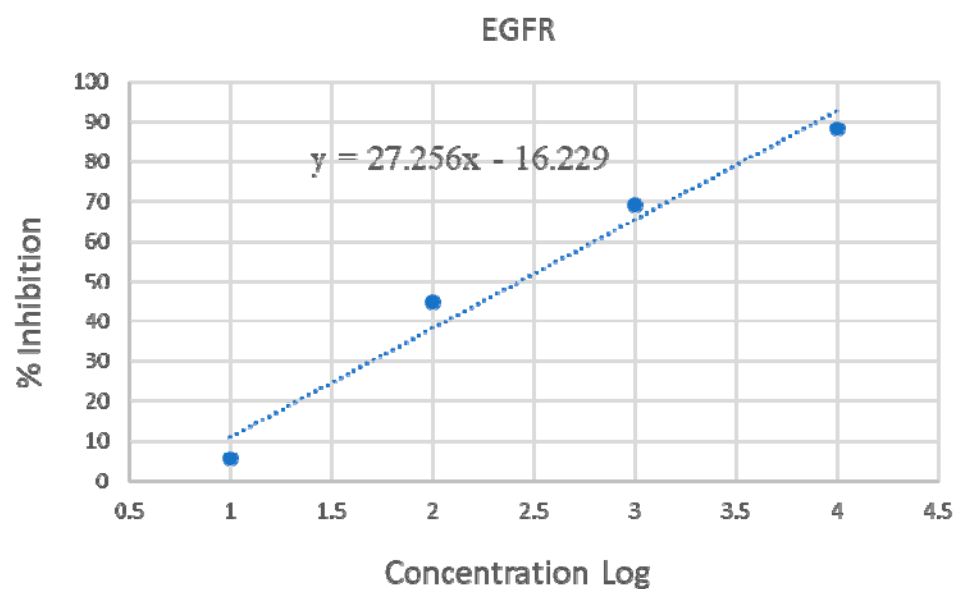

**Figure S1.** Calculation of the IC<sub>50</sub> Values of Protein Kinase Enzyme EGFR for compound 1.

$$\begin{aligned}
 y &= 27.256 \cdot x - 16.229 \\
 50 &= 27.256 \cdot x - 16.229 \\
 50 + 16.229 &= 27.256 \cdot x \\
 66.229 &= 27.256 \cdot x \\
 x &= 66.229 / 27.256 \\
 x &= 2.4299 \\
 \text{So, IC}_{50} &= 2.4299 \text{ (conc. log)} = 0.269 \mu\text{M}
 \end{aligned}$$

## Experimental data for compounds 1 and 2

Synthesis of 3-((2,6-dichlorobenzylidene)hydrazono)indolin-2-one (1) [5].

Orange powder (98%). Mp. = 286–287 °C. IR (KBr)  $\nu_{\text{max}}(\text{cm}^{-1})$ : 3165 (N-H), 2812 (C-H), 1730 (C=O), 1618 (C=N).  $^1\text{H}$  NMR (DMSO- $d_6$ , 600 MHz) (ppm),  $\delta$  6.89 (t, 1H, ArH), 6.97 (t, 1H, ArH), 7.39–7.55 (m, 2H, ArH), 7.65 (t, 2H, ArH), 7.83 (t, 1H, ArH), 8.71 (s, 1H), 10.91 (s, 1H, -NH).  $^{13}\text{C}$  NMR (DMSO- $d_6$ , 150 MHz) (ppm),  $\delta$  164.67, 155.50, 150.49, 145.80, 134.76, 134.72, 133.03, 129.98, 128.85, 122.77, 116.48 and 111.46. ESI mass  $m/z$  = 318  $[\text{M}(^{35}\text{Cl}) + \text{H}]^+$ , 320  $[\text{M}(^{37}\text{Cl}) + \text{H}]^+$ ; 340  $[\text{M}(^{35}\text{Cl}) + \text{Na}]^+$ , 342  $[\text{M}(^{37}\text{Cl}) + \text{Na}]^+$ .

Synthesis of 3-((2-chloro-6-fluorobenzylidene)hydrazono)indolin-2-one (2) [5].

Reddish brown (75%). Mp. = 277–278 °C. IR (KBr)  $\nu_{\text{max}}(\text{cm}^{-1})$ : 3165 (N-H), 2852 (C-H), 1732 (C=O), 1620 (C=N).  $^1\text{H}$  NMR (DMSO- $d_6$ , 600 MHz) (ppm),  $\delta$  6.89 (t, 1H, ArH), 6.99 (t, 1H, ArH), 7.39–7.45 (m, 2H, ArH), 7.52 (t, 1H, ArH), 7.62 (t, 1H, ArH), 7.94 (t, 1H, ArH), 8.73 (s, 1H), 10.90 (s, 1H, -NH).  $^{13}\text{C}$  NMR (DMSO- $d_6$ , 150 MHz) (ppm),  $\delta$  164.80, 162.18, 160.46, 154.25, 150.99, 145.77, 135.57, 134.74, 134.35, 134.29, 128.86, 127.07, 122.78, 119.84, 119.76, 116.67, 116.58, 116.44 and 111.43. ESI mass  $m/z$  = 302  $[\text{M}(^{35}\text{Cl}) + \text{H}]^+$ , 304  $[\text{M}(^{37}\text{Cl}) + \text{H}]^+$ ; 324  $[\text{M}(^{35}\text{Cl}) + \text{H}]^+$ , 326  $[\text{M}(^{37}\text{Cl}) + \text{H}]^+$ .
